# Supplementary material for: DNA nanostar structures with tunable auxetic properties
Source: Royal Society of Chemistry journal article supplement (doi:10.1039/d3me00202k), 2024-01-01
Supplement: d3me00202k1.pdf [file d3me00202k1.pdf]

Electronic Supplementary Information

## **DNA Nanostar Structures with Tunable Auxetic Properties**

Yancheng Du, Ruixin Li, Anirudh S. Madhvacharyula, Alexander A. Swett, Jong Hyun Choi

School of Mechanical Engineering  
Purdue University  
West Lafayette, Indiana 47907, United States  
\*Corresponding author: [jchoi@purdue.edu](mailto:jchoi@purdue.edu)

### **Table of Contents**

- S1. OxDNA Design of DNA Nanostars
- S2. Agarose Gel Electrophoresis
- S3. Additional AFM Images
- S4. Structural Analysis
- S5. References
- S6. DNA Sequences

## S1. OxDNA Design of DNA Nanostars

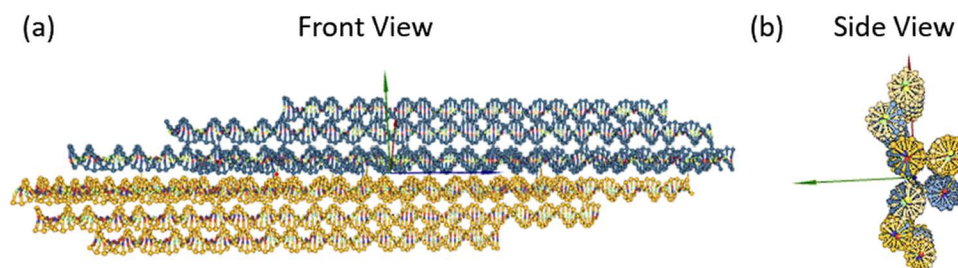

**Figure S1.** Schematic of edge design in oxDNA.<sup>1,2</sup> (a) Front and (b) side views of the edge design of four double-stranded DNA bundles. Dark blue and yellow colors indicate two distinct edges sliding against each other.

## S2. Agarose Gel Electrophoresis

Agarose gel electrophoresis was used to examine correct formations of the DNA nanostructures. The agarose gel was prepared by dissolving 500 mg of powder in 50 mL of 0.5× TBE buffer (44.5 mM tris base, 44.5 mM boric acid, 1 mM EDTA and 11 mM magnesium chloride). The solution was heated to boil and then cooled down in a mold with addition of ethidium bromide (EtBr, 0.5 μg/mL) to form a rectangular shape gel with channels. Then, DNA samples were added into the channels and electrophoresis was performed for 2 hours under 60 V. The resulting gel was visualized with an UV transilluminator to identify bands of different samples. As shown in Figure S2a, individual structures of only 9072-nt or 8064-nt scaffolds have distinct bands. The half structures based on the 9k scaffold are slower than those with the 8k scaffold due to their larger molecular weight. With 4× staples per scaffold, the bands are stronger indicating better formations of structures. Therefore, 4× were used in the experiments. Figure S2b compares the effect of the ratio between the 9k and 8k scaffolds on the assembly of three-star structures. Different ratios between 9k and 8k scaffolds (1:1, 1.5:1, and 1:2 ratios of 9k:8k) demonstrate clear bands indicating the correct formation of three-star unit cells. Note that the 1:1 ratio shows a band of half structures from the 9k scaffold. In contrast, the other two cases do not show distinctly clear bands of half structures due to individual scaffolds. Given the gel results, we chose a 1:2 ratio between 9072-nt and 8064-nt scaffolds in sliding experiments. It is noticeable that the assembled structures are faster than DNA ladders with corresponding molecular weights. This is attributed to the compact geometry of DNA origami enabling faster movement through porous agarose gel compared to free-form DNA.

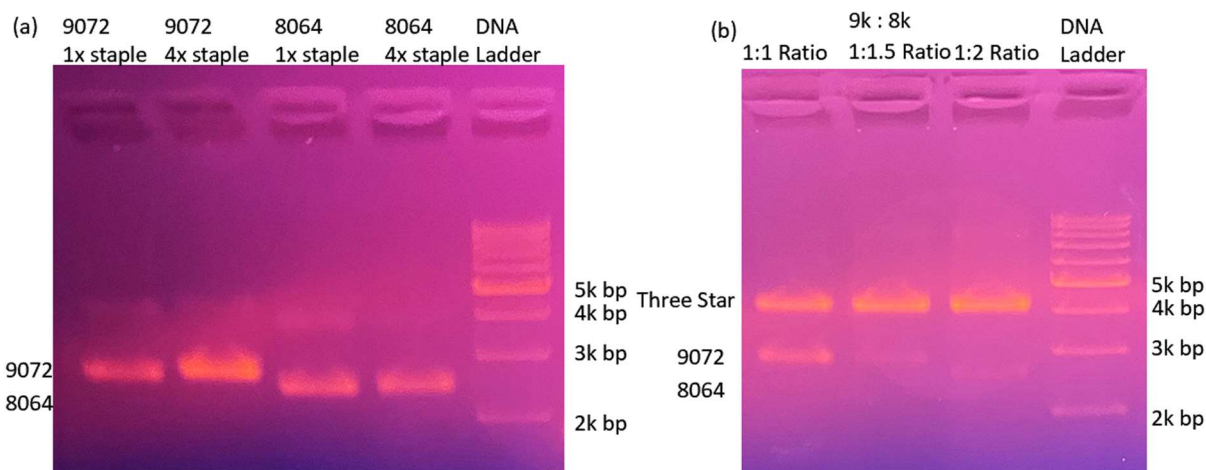

**Figure S2.** Agarose gel electrophoresis results. (a) Gel electrophoresis of half structures with 9072-nt or 8064-nt scaffolds with different staple concentrations. Two distinct bands of 9072-nt and 8064-nt based structures can be observed. The band with 4× staple concentration provides brighter bands. This condition is used for the formation of three-star structures. (b) Gel electrophoresis of three-star structures with various scaffold ratios between 9072-nt and 8064-nt scaffolds. It is obvious that the 1:2 and 1:1.5 ratios have stronger bands of three-star structures with weak signatures of individual half structures. Given the result, the 1:2 ratio has been used in experiments.

### S3. Additional AFM Images

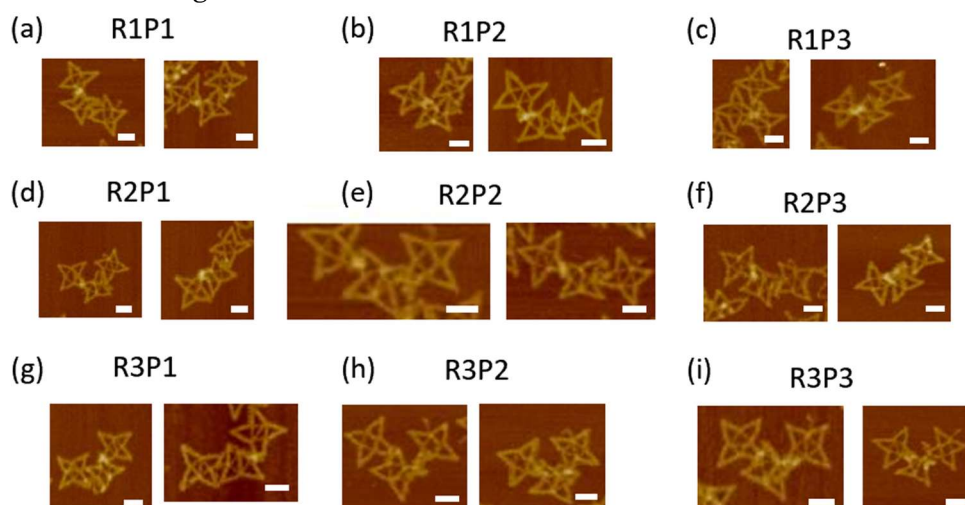

**Figure S3.** Additional experimental results for sliding on individual routes. The left star moves horizontally on route 1 at (a) position 1, (b) position 2, and (c) position 3. The left star moves vertically on route 2 at (d) position 1, (e) position 2, and (f) position 3. The right star moves horizontally on route 3 at (g) position 1, (h) position 2, and (i) position 3. The scale bars shown are 50 nm.

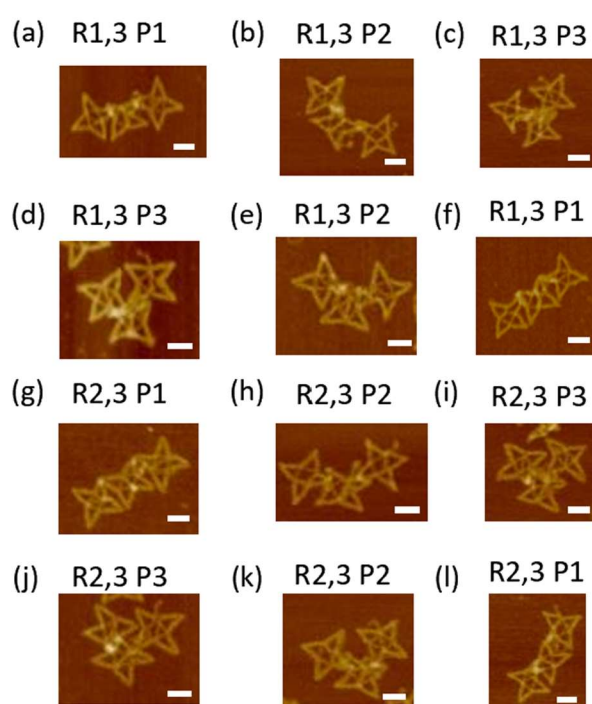

**Figure S4.** Additional experimental results for auxetic behaviors on combined routes. Auxetic sliding on combination between routes 1 and 3 are shown at (a) position 1, (b) position 2, and (c) position 3. Reversible movements are also demonstrated from (d) position 3 to (e) position 2, and then to (f) position 1. Similarly, for routes 2 and 3, reconfiguration is shown at (g) position 1, (h) position 2, and (i) position 3. Reversibly, sliding from (j) position 3 to (k) position 2 and finally to (l) position 1 is also demonstrated. The scale bars shown are 50 nm.

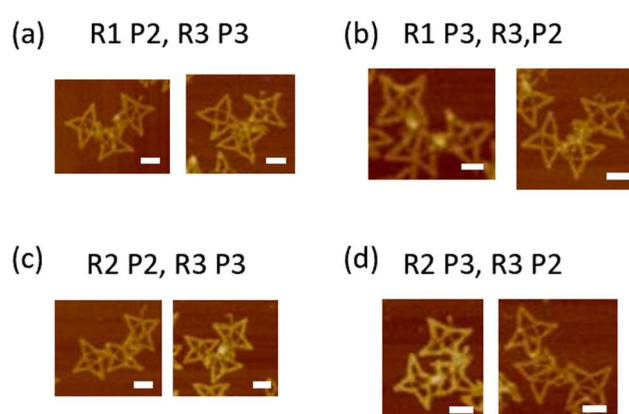

**Figure S5.** Additional experimental results for random positions. To show that control on individual routes is independent. Starting from undefined positions, several random reconfigurations are chosen. (a) Route 1

at position 2 and route 3 at position 3. (b) Route 1 at position 3 and route 3 at position 2. (c) Route 2 at position 2 and route 3 at position 3. (d) Route 2 at position 3 and route 3 at position 2. The scale bars shown are 50 nm.

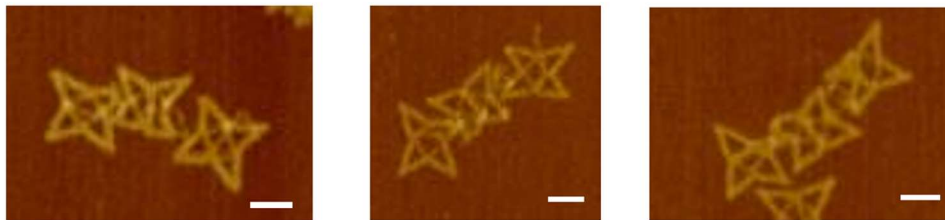

**Figure S6.** Additional experimental results for reconfigured, undefined positions. The AFM images show structures released from designated positions after removing positional staples. The left and right stars show detachment from the middle star as well as random orientations. The scale bars shown are 50 nm.

#### S4. Structural Analysis

Our unit design includes three nanostars. Each nanostar made of DNA origami has eight outer edges which are designed to have a length of 130 bp or approximately 43.2 nm. MD simulation suggests an edge length of  $\sim 40.0$  nm. The edge lengths in AFM images are measured to be approximately 41.2 nm on average. Left and right stars slide along the edges of the middle star. A ss-loop is designed to distinguish between the left and right stars due to asymmetry, which could potentially be used to indicate sliding activities with additional mechanism designs. The sliding distance between two neighboring positional staples is designed to be 63 bp ( $\sim 20.9$  nm), while oxDNA structure shows  $\sim 19.9$  nm. The distances measured from AFM images between 1<sup>st</sup> and 2<sup>nd</sup> positions and between 2<sup>nd</sup> and 3<sup>rd</sup> positions are approximately 20.0 and 20.1 nm on average, respectively. The measured lengths and distances from experiments are used to compute Poisson's ratios for auxetic reconfigurations for route 1 and 2 which are -0.42 and -1.01 on average, respectively. These are consistent with theoretical Poisson's ratio of  $\nu = -0.414$  and -1. Overall, the analysis shows that our theoretical design, MD simulation, and experiment are in excellent agreement.

In this work, the sliding movement is enabled by toehold mediated strand displacement (TMSD) and reannealing with a new (intended) set of positional staples. The removal and insertion of positional staples work fairly well as TMSD and reannealing are well developed methods. These reactions are reported to be highly efficient while experimental conditions such as concentrations and temperatures may affect kinetically.<sup>3-5</sup> As in any multi-step movement, however, the overall efficiency of stepwise reconfiguration in our experiment will decrease exponentially with the increased number of steps. We have characterized our initial formation efficiency of the nanostar structures from AFM images, which is approximately 68%. The efficiency of a single step movement is estimated to be roughly 35%.

#### S5. References

1. Snodin, B.E.K. et al. Introducing Improved Structural Properties and Salt Dependence into a Coarse-Grained Model of DNA. *Journal of Chemical Physics* **142**, 234901 (2015).
2. Shi, Z., Castro, C.E. & Arya, G. Conformational Dynamics of Mechanically Compliant DNA Nanostructures from Coarse-Grained Molecular Dynamics Simulations. *ACS Nano* **11**, 4617-4630 (2017).
3. Zhang, D.Y. & Winfree, E. Control of DNA strand displacement kinetics using toehold exchange. *Journal of the American Chemical Society* **131**, 17303-17314 (2009).
4. Šulc, P., Ouldridge, T.E., Romano, F., Doye, J.P. & Louis, A.A. Modelling toehold-mediated RNA strand displacement. *Biophysical journal* **108**, 1238-1247 (2015).
5. Srinivas, N. et al. On the biophysics and kinetics of toehold-mediated DNA strand displacement. *Nucleic Acids Research* **41**, 10641-10658 (2013).

## S6. DNA Sequences

**Table S1.** Sequences of staple strands for the undefined position of three-star unit cells. Lowercase letters indicate toeholds and binding domains of positional staples.

| Name     | Sequence                                           |
|----------|----------------------------------------------------|
| 0[139]   | GTACTGTTGGTAACTTCCGCAGCACAAACCACAAAAGTTCGGATGTCACC |
| 0[153]   | AGAGATTTTCGGCGTAGCTGGGGGAGTGTCTCTCGCAACAGAG        |
| 0[69]    | AAGTTCACCATGGTTAGGACCTAAGTGTATTATGCAACACGGA        |
| 0[97]    | CCCTACACGGCTAAACCGACTCTTGGCGTGTCTGTCTGAGAG         |
| 1[129]   | GGTGCAGCGAGGCGCAAGTAAGGATCGAGCTTGAGTGAGTGG         |
| 1[154]   | GTTGCCTTTTGGTTACCAGTAAGCACAC                       |
| 1[45]    | TTTGGAGACTTCACTCATGACACGTTGACTATCCTTAAGAGT         |
| 1[70]    | CCCACCCCGCACTAGGGCTTACATACTGACACTACCTGGGAT         |
| 1[84]    | CATGGATCGGCTTGCTATGGTGACAAAAGTTTAAACGAATAT         |
| 10[139]  | CGCCGACTCCGCGATCACCGCCATTAGGAGCCGTGGTAATT          |
| 10[162]  | ACGATATCCTCTATGTGAAGAATTCGGGACAACCGAC              |
| 10[97]   | GCTCTAGAGCGATCCGTCCTACCTGTCCCCACGAAAAAGATC         |
| 100[139] | ACGAGTAGTAAATTCACCACCTTTTCGGTCATAGCTCACCGG         |
| 100[153] | CGAGAAACAGAGCCTGTAGCGGTTTTACGTACAGCG               |
| 100[90]  | GTGAATTACAACGCCTGTATTTTCATAATCAACTTTAATCATT        |
| 101[126] | AAACAATCGGCGAAATCGGCAGGAACCGCCTCCCTCACCAGA         |
| 101[150] | CCATGTTTACCGTCAGACGCCACCC                          |
| 101[171] | TTTGTGAGAGAAGAATCAAGTTTGCCTTTAGCAGTCCCGGAA         |
| 101[91]  | GGTGGAGCCGCCACGGGAACGGATAACCCCCCTTAACCGGAA         |
| 102[104] | TTGCCATCTGCATTCCACAGACAGCCCTGCCAAGCTTTCAGA         |
| 102[62]  | CGATCTACGTTGTAAAACGACGGCCAGTCATAGTTCACCAGT         |
| 103[119] | CCAGAGCGGGCTTGAGATGGTTTAATTTCAAATCTTAGCGT          |
| 103[161] | TCAGAACCGCCATTTTTAGAGCCACCACCCTCAGAG               |
| 103[57]  | CACTGATGGCTCATTTTTTTTTGTCAGGA                      |
| 103[77]  | ACAAACTACCTTATGCGATTTTAAGAACGTTTCGTAGCGTAA         |
| 104[111] | ATGAGGAAGGGTAGTGCTAAACAACCTTGGCGAAAGGGGGAT         |
| 104[155] | CGTTGGGAAAACAACAGTCTTTCAGACGTGCCAGGG               |
| 104[76]  | ATGCCACTACGAAGGCGGGATAGGAACAACCTAAAGGGAAGGG        |
| 104[97]  | ATTAAACGGGTAAAGCGAAAGTTCAGCGGAGTGAGCTCTTCG         |
| 105[112] | GTGCTGCGGGATTTCAACGGCTACAGAGGCTTTTAAAACGAA         |
| 105[129] | AGTTGGGTAACTAGTAAATGAATTTTCTGTATAAGGCGATTA         |
| 105[147] | TTTTCCAGTCACGTTTTGTCTTATTACAGGTAGA                 |
| 105[28]  | ATTCGCCTCACGTTGAAATTTTTTTTCCAAAAAAAAGGCTCCAAAAG    |

|          |                                             |
|----------|---------------------------------------------|
| 105[45]  | CGCAACTGTTGGAATTGCGAATAATAATTTTTATTTCAGGCTG |
| 105[63]  | CGATCGGTGCGGGCAATAGAACGTCACCCTCAGCAATACGTA  |
| 105[84]  | CTATTACGCCAGCTCAACAGTACAGCATCGGAACGAGTTTCC  |
| 107[140] | CTAACGGGAAAAATCTACGTTAAGAGGACTAAAGACTTTTTTC |
| 108[59]  | CAGAACCGCCAATTCATCAGTTGAGATTTAGGCCGCCACCCT  |
| 108[80]  | CACCCTCAGAAAATACCACATTCAACTAATGCTTAGTACCGC  |
| 109[101] | CGCCAAAAGGAGTATCACCGTACTCAGGAGGTAGATACATAA  |
| 109[122] | ATTACGAGGCACCGGAATAGGT                      |
| 11[101]  | AGTGCAAAGGTCTGGCGGATGTTCTAGATTAA            |
| 11[126]  | GCAGTCTCGATGTTAGA                           |
| 11[143]  | CAGCACCGTTACGTCGAAAGCCACTTACGGGTAAACAAC     |
| 11[166]  | TAACACTAAAGCAATTGTCGG                       |
| 11[28]   | CACCTTATGC                                  |
| 11[38]   | TCAATATTCTCATATAGACTA                       |
| 11[59]   | CATAGTTCCCGGTTAAGCGTAGCGATGTCCAA            |
| 11[84]   | GACCAAATTAGTGTGGA                           |
| 110[139] | CAACCTAAAACGAACGCCACTTGCTTTCGAGGTGGAAGATC   |
| 110[90]  | ACCCCAAACCAAAATAGCGATAGTTGCAACACTCATCTTTG   |
| 111[126] | GCACTCCAGCCAGCTATCAGCGCATAACCGATATATTCGGTC  |
| 111[49]  | TTGGTGTAGTAAAACTATCATAACCCTCAAAGTACAACGGA   |
| 111[91]  | GAGGGGACGACGACAGTATCGGCCTCAGAATTTCTATGACAA  |
| 112[104] | CTTGATACCGAGAGGCTTTTGCAAAGAGCATCTGCCAGTTT   |
| 112[150] | TTGTATCGGTTTTTCCGGCACCGCTTCTGGTGGAGCCTTTAA  |
| 112[62]  | GGGTAATAGATGGGCGCATCGTAACCGTAGTTTTGCAGACGA  |
| 113[119] | CAACCATAGAGGCAAAAGAATACACTAAGCCGACATAAACAG  |
| 113[154] | GCTGAGGCTTTTTTGGAGTTAAAGGCCGCTTTT           |
| 113[39]  | TAAGAGCAACTGTTTAGACTGGATAGTTTTAGATTTAGTTTG  |
| 113[77]  | CGATAAAGCGATTATACCAAGCGCGAAACGTTTACCCAGAGG  |
| 114[132] | GCATTAGACGGGAGAATTAAGTGAACACAGACAGTTAGCTGA  |
| 114[162] | ACAGAGAGAATAACATTTTGGGGGATACATTCGCAATCTCCGT |
| 114[69]  | TCAGAGAAGTAATGGATCTACAAAGGCTCGCCATCAAAAATA  |
| 114[98]  | CAAAGTCAGAGGGTACAAAAGGAGAGGGTAGCTATTTCTGGCC |
| 115[129] | ACCCGTCGGATATGGTCAATAACTGATATTCAGCGAGTAACA  |
| 115[147] | GGGAACAAACGGCGACCATTACGCGAGCTGAAAAG         |
| 115[161] | GATTGACCGTATTGGGATAGGTCACG                  |
| 115[45]  | ACCAATAGGAAATCAGGTCATTGCCTGAGAGTTCATTTTTTA  |

|          |                                                               |
|----------|---------------------------------------------------------------|
| 115[70]  | ATTCGCGTTTGAGATGTAGGTAAAGATTATTGAGCGCTAATA                    |
| 115[84]  | TTCCTGTAGCCAGCATGCCGGGTGAGAAAGGCCGGCCTGAA                     |
| 116[104] | TAAATTATTTTCATCAACATTAAATGTGAACCGTTCCAAATCA                   |
| 116[34]  | CTGGAGCAAACCTTTTTTTAGAAATCGATGAACGGTAA                        |
| 117[119] | CCATCAATACTGTTTAGCTATATTTTCAAAAAACAGGGAAGC                    |
| 118[101] | TAGGATTAGCGTCATACAGGCAAGGCAAAGAAAGAGAAGGAT                    |
| 118[59]  | CGTCGAGAGGGGCATCAATTCTACTAATAGTAGGATAAGTGC                    |
| 118[80]  | CAGTACCAGGCGTAGCATTAAACATCCAATAAAGGGTTTTGCT                   |
| 119[122] | TTAGCAAAATTGAGACTCCTCA                                        |
| 12[139]  | GTCCCAGTCAAGCAGAGTGGATATTTGT                                  |
| 12[31]   | GGATGGCGTTTTTTTTCTGAAGTGATG                                   |
| 12[55]   | TAGGGAGGCACACACGCTTACGAC                                      |
| 12[97]   | TTCGCGGCATGGAAAGTGGATTTGCTA                                   |
| 120[132] | GCCCAATGGGAGAATCAGAAAAGCCCCAAAAACAGGTTTCTT                    |
| 120[153] | AACCCACGCAAGGACATATGTACCCCGGAATTGTAAACGTTA                    |
| 120[69]  | GAAAAGTAGCCTCAAGCAAATCGTTAACTTTGGCGCGGTTGC                    |
| 121[133] | ATATTTATTGATAAGCCTTTATTTCAACAAGAATTGAGTTAA                    |
| 121[154] | ATATTTTTGTCAATTA AAAATTTTTAGAACCTTTTTTATTTTAAATGCAATGC<br>CTG |
| 121[70]  | GGTATGATGTGTTTCGAGCATAAAGCTAAGAAGCCCTTTTTAA                   |
| 122[104] | TGCTCGTGGCTGGTAATGGGTAAAGGAAGATTGTATAAGCAA                    |
| 122[174] | TCGTAAAACCTAGCAGTTAAAATTCGCAT                                 |
| 122[83]  | ACACTGGGCCGGGTCACTGTTGCCCTGCCATAAACGTACCAA                    |
| 123[112] | TGTAATACTTTTGCAATAAGAGCAAGAAACAATGAATGACCC                    |
| 123[57]  | CAATAAAAGCAGATATTTTTTTTCAAAGTTAC                              |
| 123[98]  | AAACATTAATAGCAATAGCTATCTTACCATCGGTTATCCCTT                    |
| 124[101] | ATTTTTTGTTTTTCGAAATCCGCGACCTGCTCCATAAGAAACG                   |
| 124[143] | AATAAACAGCCGCGCAGACGGTCAATCATAAGCCAGTTACAA                    |
| 124[164] | AGCCTAATTTGGGAACCGAACTGACCAACTTTGTCTTTCCAG                    |
| 124[185] | CGCTAACGAGCGAAAGAGGACAGATGAACGGTATCTTACCAA                    |
| 124[80]  | ATGAAAATAGCATCATCGCCTGATAAATTGTGAACGTCAAAA                    |
| 125[122] | GCCGGAACGAGATATTATTTATCCCAATCCAAATGTTACTTA                    |
| 125[196] | GTACAGACCAGTTTTATCCTGA                                        |
| 126[195] | AGGGCGACACGGAATCCCCGAAAAGTGC                                  |
| 127[112] | TTAGAGCCGTCAATTCAAAAAGAAT                                     |
| 13[119]  | GGGGTCCGGGTCCAGCGAAGTCAATAGCGTCGAGCTATGAGTCTAGCAT             |

|         |                                                               |
|---------|---------------------------------------------------------------|
| 13[77]  | GCGTTGTGCCACCGTCTCAAGACGGAAATTGGATGTGGCCTATGATTC              |
| 14[59]  | CGGAATCTGGTGCCTCAGCTGTCCGGCTATGAAGATGGGCAGC                   |
| 14[79]  | ATAATGCCATCGTTACTGCC                                          |
| 14[87]  | CATAAACTTTGAATTAGCTACGATCGTAGACC                              |
| 15[104] | CGGACAAGATCTGTCTTGCCTGTATCACTCTT                              |
| 15[122] | CTGATACGCGAGGTATGATGAA                                        |
| 16[132] | GCAACTCTCAGTACTACAGA                                          |
| 16[153] | AGAGCAGCCCGCGAAGGACTCGAGGCGAGCATCTTACTCTGA                    |
| 16[94]  | ATGATCCAGTATTCCAACCGGTGTGCGCCTACAAGGCCCTTG                    |
| 17[112] | ATTAAACTAAATAAAAATTGG                                         |
| 17[119] | GTCGTCATCTACT                                                 |
| 17[132] | GGGTGTTAAGGCTTAGAATGAC                                        |
| 17[154] | GCGAATAGCTGCTTTTTGAGTTTAGATCGGGCCTTTTTTCCGACTAGCTATCT<br>AACT |
| 17[161] | GACCTGATCTGCC                                                 |
| 17[174] | TCAAGGAT                                                      |
| 17[55]  | TTAAATCCTTTTCTACTCGTACGCTAGCCGGTAGCG                          |
| 17[77]  | CTACAGATCCTCG                                                 |
| 17[90]  | TGACATTGGTCTCTCGGCCCTA                                        |
| 18[104] | GCCTGTGGGACGCAGCTCGG                                          |
| 18[126] | GCAATACA                                                      |
| 18[168] | GCCAAAGC                                                      |
| 18[181] | AGGCCTTACCGAA                                                 |
| 18[84]  | CTCGGATC                                                      |
| 19[119] | GTCGGCAACATAGCTGTGGACGATCCCAGTTTTTGGTACCTC                    |
| 19[140] | AGAAGATTTCCGGTCCGCGGT                                         |
| 19[57]  | CCGACCCAGTCTTGTTTTTTTTTACAGTTA                                |
| 19[77]  | CAGGTGTCCCGGTAGGGGAACGCTATATACTGGAGACCTCCCCTTGGTG             |
| 2[104]  | TCATTGTGGACCTTGGAAGACGAAGCAGATCTAGTCCTCGGG                    |
| 2[34]   | GCTTGCCTTATTTTTTTTTTTGACATACCTGTTCTAGTCA                      |
| 20[111] | CTAGACGACCCCGTTAGTATAACCAGGATGTAAGCTTCGCATA                   |
| 20[155] | GCCCCATGTGGCCCAATTAATCATCGTGGCCTGCTAT                         |
| 20[76]  | TCTCAGTCATGTCGCTCCATAAGGCGATTCCGGTGATAGGAAG                   |
| 20[97]  | TGGTCATTGCTATCCAACCTGCACAGGTGATTAGACAGATGAG                   |
| 21[112] | CATTAATTGGATGATTCCTCTGCAAATCTAAGTTGCGGTCGC                    |
| 21[129] | CTGCGGCCATTTTCATGGGACTTTAGACCACCCACACTCGTCC                   |



|         |                                                |
|---------|------------------------------------------------|
| 21[147] | GGACTATTCAAATTACCAAAAACGCTGATGACCGT            |
| 21[28]  | ATAGTGAGAGCGTGCCTTTTTTTTATAAACAGGAATCGAAGAACCC |
| 21[45]  | AGACCGAGTGAATGCAGGTAATCCAGCAAATACTCTGTGATA     |
| 21[63]  | AGGACGGGCGGCAGGTATATTACAGGGAGAGATATAAGCGCA     |
| 21[84]  | CAAACATAAGGAGTAAATTGCATAATCTACAGTCACTATCT      |
| 23[140] | TGTCCGAGGATTTGTGTTTGCATCACGTCGCTAAAGATGAAT     |
| 24[101] | GTAGCCTCGCTATGGATTCCAGGCAGCGGTAGCCTCCAAGAG     |
| 24[59]  | TCTAAGAATCCGAATGTTCACTAACCGAACCCAAATATAGTC     |
| 24[80]  | GACATCGGACGCAGACAGGGGCTGGAAGGCCGTATGTTGGTG     |
| 25[122] | CACATACAAACACAAGAATGCT                         |
| 26[139] | GGGGCAGAAGGAGGACTGCATAGCCCGCCCAATATCAGACGA     |
| 26[90]  | TCAGGTTAGGGAACCTGCCAGCACGGGCGGCAATAGATTGAG     |
| 27[126] | GCGCCTGCGTGCAGAAGTTTGATATACTTCTAACGACACTGC     |
| 27[49]  | TATCTTCGGGTAAGCTGGTCTGACAGTCTGAGGAGTATGAGC     |
| 27[91]  | ACCATCGTTCAGTTCGTTTCGTAAATCTCCATTTCTGATTGAA    |
| 28[104] | AAAGAAATCTAGACCGGCAGGCTTTTAGAATTAGAGTGTCTC     |
| 28[150] | CGTCGGAGTTGAACACAGGACGTTATGTGTCCGGCATTTCGAC    |
| 28[62]  | AGATTCTGTTAATGGAAGCCGCGTTCTCAAATACCCGCGAAG     |
| 29[119] | CACCGCCAAGCATGCGAGCCAACGACCGTGATCCTCCCCAAC     |
| 29[154] | TTTGCGGGGTTTTTTTAGCACTCAGCCTCCGCA              |
| 29[39]  | CAACGCAGTGAGGGCCCATGGCGGCCTTTAATTGCCGGCCGA     |
| 29[77]  | ACACCGGTTGCGTTTTAACATTGTAGCACCGTTAGATAAGTG     |
| 3[119]  | TCCCCTGCTGTAGATGCTCGTGTCCGTAAGGTATA            |
| 30[132] | GCTAGGACAGAGAATGTCGCGGTATAATCAACTTCTCTAGTA     |
| 30[162] | TACGAGCCCTTAGGGATATCCATTCTCCGGGCGAGTAGTAAACC   |
| 30[69]  | GATACCCCAGGCTATTTCTAGAGATCGCGCGTCGGCCACA       |
| 30[98]  | AGGGGCCTACCAACTAACCTTGTCAACAGAAAGTTGCAACCAG    |
| 31[129] | GCCGCCGGAGCTTATAACTAGTAGGGCAAGATCTCATCGCTC     |
| 31[147] | TCCGTTCTGTACTTAACAAATACCGGCGTCATAAC            |
| 31[161] | CCTGAAACTACTTGGCATGATTGTAA                     |
| 31[45]  | ATTCGTCGGGAACTACTAGCCTTGGCCGGTTTACAGCAACTG     |
| 31[70]  | ATTTGCCGGTACGGCAGGAGGCCGACCGTCCATTTCGGATGA     |
| 31[84]  | CTGCAGACATAGGTGCCTGTAAGTGCATATTGTGCTGTA        |
| 32[104] | CGTTGCATGTAGAAGGCGACGGGTTATACATGAACGACACGG     |
| 32[34]  | AACGTAAAAAGTTTTTTTTGGTCCTTCGGAAAAATT           |
| 33[119] | TGGTGACCAAGTATTGTGTGGGGCCAACAAATCCCTGACCT      |

|         |                                                                |
|---------|----------------------------------------------------------------|
| 34[101] | TCAAATACGAACGCCGTACGTGTTCCCAGTCAACCACTAAGG                     |
| 34[59]  | GTCACAGGGTCCAGGAAAGGGTCAGCGGAACGTTGTTAAGAC                     |
| 34[80]  | GGTCGCCCCCTATATTAGAATAAGCATCGGTATAACGGATCTA                    |
| 35[122] | GCAGTAGTAGCGTACTGCGGTT                                         |
| 36[132] | AAGCTGGCAACCGTTCAGGTGCTAGTTCACACCCGCTAATA                      |
| 36[153] | GAATTGACTTTACAATCCCACCGGCTACGGGAGTACGCATTC                     |
| 36[69]  | TAACGAGTCCCATATACAGGTCCATCTGGACATCTCGAATAA                     |
| 37[133] | GTGCCGAATCTGTGTTACTTAGTACACAAGCAACCGCCTTTT                     |
| 37[154] | CATCCTCATTGTTTCGTATAGGGACCAGTGACGGTTTTTTGAATGAGCGCACTT<br>GCCA |
| 37[70]  | CTTGCAGACTAGTGGGATCCGGAAGATTTTCGTGCTATACAA                     |
| 38[104] | AGATAAAAGCTCGTTGTTGCTCCTGACGTGTATACGATACAT                     |
| 38[174] | GCGCCATAGTAGGCAAAGTATCGAAAAG                                   |
| 38[83]  | GTAAAAGGGCCACGCTAGTGGCATCTATCGAGGTTATGGGAT                     |
| 39[112] | CAGGCGGGAGGATTCGTCCAAAGTCATTTTCGGTCGTGCCAT                     |
| 39[57]  | CACATTTTTGTGCGTTTTTTTTGTGAATATA                                |
| 39[98]  | TGCCATTCAATCACGTGCAATATATCTGACTCGGGCTCCTAG                     |
| 4[101]  | CGAACACTGGGAAGGCCAATTATGATACTCTCGAACGACGCC                     |
| 4[59]   | CCATCTTCAGGCCCATCTCCTGGCGCCTTAGCACTCGACTA                      |
| 4[80]   | TTTGGTGTGGCTTAGACTTACAGGATGTAACCTAGAGCCTC                      |
| 40[101] | GATGCAATCTGTCTTCGGCTGAAAGGTAACACTTCCTACGCA                     |
| 40[122] | CAACGAAACTGATGCGCGGAAACCTTCGTAGTTTCCTTGCCG                     |
| 40[143] | TCCGCAAGCGGCCCGGGTGCTTGGCTGCTCCTATGGTGTGA                      |
| 40[164] | GGGGATCCAAAACCCATGCGTTCGGCAGTCCAAGACTTGCTC                     |
| 40[185] | CTAACCCAAGAACTCTCATGTACAATTCCAATACGTATGCCT                     |
| 40[80]  | CATCGATTGATGAGCGAGATCCACCGACCTTCACCATGTCCG                     |
| 41[196] | GGAGAGCGCTAGCGTGCTTCTT                                         |
| 42[139] | CGTTAAGTAGACGCGATAACCGTGATCGGATAGAATTCTTTC                     |
| 42[153] | TTCACCCCTTCTTCGTTAATAGTTTGCGCCGCGTGACCCACG                     |
| 42[69]  | TCTTACCCAATACGGGTCCCAACGATCTCATCCATAGTTGC                      |
| 42[90]  | CGGGGCGCACATAGCAGAACTTTAAAAGTGCTCCTACGCTAA                     |
| 43[105] | AGGGCTTACCATCTGGCCCCAGTGCTGCAATGATACAACGTT                     |
| 43[154] | CTCACCGTTCGCCAAAGATTGTTGATGG                                   |
| 43[45]  | GTCTATTTTCGTAAGGCGAGTTACATGATCCCCTCAGCGATCT                    |
| 43[70]  | CTGACTCCAGCTCCGGATAATACCGCGCAAACTCTCAAGGA                      |
| 43[84]  | TGTAGATAACTACGGTCGTTTGGTATGGCTTCATTCCCCTCG                     |

|         |                                                 |
|---------|-------------------------------------------------|
| 44[132] | GTTGCCATTGCTACAGGCATCGTGGTGTACGCTCATACGGG       |
| 44[34]  | CATGTTGTGCATTTTTTTAAGCGGTTAGCTCCTTCGGTCC        |
| 45[119] | GACTCGCTACGGCCCAGCATTGGATCATTGGAAAACGTTCTT      |
| 46[59]  | AATTTTCCCTTTGGAGTAGTCAGTTTACAAGGGCTATTAATT      |
| 46[76]  | AATCGTCAGTCTCAGATACGTGGTCAATGAAGTCTGTGCGGT      |
| 47[105] | GGCGTATATCAATATATGTGAGTGAATAACCTTGCTTCTGTA      |
| 47[122] | GAAAGTAGGAGACAGTACATAA                          |
| 48[132] | CGATGTATACTCAAGCAGTGTTATCACTAAAGTATATATGAG      |
| 48[90]  | TTACTTTCACCAGCGTTTCTGGGTGAGCCTAATCGACCTCAC      |
| 49[133] | TAAACTTGTTGGCCCAAGTCATTCTGAGTTGAGATCCAGTT       |
| 49[150] | TTACCAATGCTTCCGATCGTTGTCAGAAGTAAGGTCTGACAG      |
| 49[49]  | GTCATGACAGCAATCGACGCTCACTAGGAAAAACAGGAAGGCAAAAT |
| 49[87]  | TTTAAATTAATAATTCTCTTACGCACCAGCCCCTAGATCCT       |
| 5[122]  | GTCAGAAGCGGGACGTACCGTA                          |
| 50[104] | CACTGCAAATGAAGTTTTAAATCAATCTCATGGTTCTGTGAC      |
| 50[62]  | TGAAGCTGATTATCAAAAAGGATCTTCAGCTGTTAACGAGGC      |
| 51[119] | TGGTGAGACCCACTCGTGCACCCAAGTGTGCTTTTATGGCAG      |
| 51[147] | GAATAGTGTATGCGGCTTTTTAGTTGCTCTTGCCCGGCGT        |
| 51[39]  | AAGCTCCTGTCGTTGAACCGTACTTTTTGGCTGCGATCATTACGAA  |
| 51[77]  | AATGTACGGTGTGCATGCCATCCGTAAGAATCTTCAGCATCTT     |
| 52[139] | ATTTTGCGGAACAATTCGCCTACCTGGTTTATATGAAGATCC      |
| 52[162] | TTAAAAGTTTGAGTAACCAAGTTGGTTCGATCAGTGGCGGGGTC    |
| 52[90]  | TCCTGATTACAGTAAGGGACACCACTTATTGCAAGCAGCAG       |
| 53[126] | TTTGATCTTTTCTAGAAGTCGGATTGCTTTGAATACATTATC      |
| 53[147] | TGACGCTCAGTGGACCTTATTACAAAATCGCGCAG             |
| 53[166] | AACTCATGTTAAGGGATTTTG                           |
| 53[45]  | ACAAACCACCGCGGTGTATGGGTCTGTAATTAGATCCGGCAA      |
| 53[91]  | ATTACGCTCATACAACAGTACCTTTTACAATTATCATCATAT      |
| 54[104] | GCCTGGGGCAGAAAAAAGGATCTCAAGGGGGCATGAAACAA       |
| 54[34]  | TCAGAATTCAGTTTTTTTTTCTAGCTTTT                   |
| 54[62]  | GGTTAATCTGGTAGCGGTGGTTTTTTTTGCGCCTATACGTCAG     |
| 55[119] | TAACGGAAGAAACCACCAGAAGGAGCGGATCGGGAAGATATG      |
| 55[77]  | ATGAATATATCAGATGATGGCAATTCATAGGTTTAAAGTCGG      |
| 56[103] | AGTTAATTACATCAAGAAAACAAAATTAATTACACTGAGCAA      |
| 56[59]  | TCATTTGAATTCGAATTATTCATTTCAATTACTTTAACAATT      |
| 57[122] | ATTTAATGGTACTTTTTTCAA                           |

|         |                                                             |
|---------|-------------------------------------------------------------|
| 57[78]  | AAGAAGATGATGAAACAATCATCTTCTGACCTAATATATTTT                  |
| 58[111] | TTTAGTAAATCATAAGAAGTGTATTCTGTTAGTTACAAGTGG                  |
| 58[139] | TTTGGATTATACTTGAAGGGTTTTTGTAGTTGCCGCTACGGC                  |
| 58[153] | TATAATCTCAAATTCGTAGGTCTCAAGAGTATTTGGTATCT                   |
| 58[90]  | CAAATTCTTAAATAAGAATAAACACCGGTCATATGCGTTATA                  |
| 59[112] | GGCCTAATTGAGAGATTACTAGATAATGCTGAAAAAAGCCTG                  |
| 59[126] | TACACTAGAAGAAGTATGCTATAGAACCTACCATACTGATTG                  |
| 59[154] | GCGCTCTCCTACTGTATTTGCACGTAACAGATTTTTAGAAATTGCGTAGAT<br>TTTC |
| 59[171] | GTTACCTTCGGTCTTGCACAGGTTGACGCGACGCTGAAGCCA                  |
| 6[132]  | GGGGCCGCGGTAGTATCGCTTCGAACGGCTCATTGGCCATG                   |
| 6[90]   | TACATCAAACAATTAAGAAACCCTGCCACTAGTATATCCGCG                  |
| 60[62]  | GTAAAGGTAACAGGATTAGCAGAGCGAGGCTTTATTGATAAA                  |
| 60[83]  | TTATGCCGTATGTAGGCGGTGCTACAGAGTTCTTGAAGTGGT                  |
| 61[57]  | AATACCTCAACAGTATTTTTTTAATTGAG                               |
| 61[77]  | TAAGGCGTTACCAGTATAAAGCCAACGCGACCGTGAGCCTGA                  |
| 62[111] | GCGGTCACAGCAGAAGATAAAACAGTAGAAGAAGTCAAATA                   |
| 62[155] | AATCGCCATTGCTGGTTTACATGCCCGCATCGCCACT                       |
| 62[76]  | GCTGAGAGCCAGCAATAGCCCTTCCATATGCTGAATGCACGA                  |
| 62[97]  | CACCGCCTGCAACATAAAAAATCATAGCGAACAAACCCGACCG                 |
| 63[105] | TCGTCTTGAGTCCAACCCGGTAAGACACGACTTATTGAAACC                  |
| 63[147] | GGCAGCAGCCACTGGCGACGAAATATCCAGAACAA                         |
| 63[28]  | TAGGTCGATATAACACTTTTTTTTTAGCTAGGCGGCTAG                     |
| 63[45]  | GCTGGGCTGTGCCTACTCTTTTCAAGTGACCTTTCGCTCCAA                  |
| 63[63]  | ACCCCCCGTTCAGCCCCAAGTAAAACATCGCCATGTGCCAC                   |
| 63[84]  | CTGCGCCTTATCCGGTTACCGACCGAACGAACCACGTATTAA                  |
| 64[132] | GCGCCGGGAGTCATCGACAAGTCAGAGGGGCACGCGTAACTA                  |
| 65[140] | TCGGCCTATTTTAGTAATAACATCACTTGCCTGAGAGGTGAG                  |
| 66[59]  | ACAAAGAACGCTACCGCCAGCCATTGCAACAGCAATCGCAAG                  |
| 66[76]  | GCAAATCGAAAAACGCTCATGGAAATACCTACATTTTGACGC                  |
| 67[105] | TCAATCGTAGGTTGGGTTATATAACTATATGTAAATGCTGAT                  |
| 67[122] | TCTGAAATGGAAACCTCCGGCT                                      |
| 68[111] | AACCTCAGAACCCTGTCTCCtgggtgtg                                |
| 68[139] | ATGAAAAATCTAAAGTAAGAATGAAAAC                                |
| 68[69]  | CAAATCAACACGACCTGCTAAaaacctga                               |
| 69[112] | GTCCGCCGGCAACGTCTGACCTGAAAGCGCATCACCTTGCTG                  |

|         |                                                    |
|---------|----------------------------------------------------|
| 69[140] | GCGCTTTCTCAT                                       |
| 69[152] | AGCTCACGC                                          |
| 69[49]  | GTTTCCCCTAGAGGCAGATTCACCAGTCACAGTTGAAAGGAA         |
| 69[70]  | CGTGCGCGGAGCGACAGTAATAAAAGGGACATTCTGGCCAAC         |
| 69[89]  | ACCCTGCCGGCTGAGGTCGT                               |
| 7[133]  | CCGTGGGTTGATCTTCTGAGTTACGGAACGTGTGACTAATCC         |
| 7[150]  | CTAAACGCGATTAGTGTCTGACGGAGCACCAACATAATAAC          |
| 7[49]   | GCAGTGAGCCGTCCCCCGTAGGGCATCGGTTAGGCTCGAAAGTCGC     |
| 7[87]   | CGGGGTCTCGTATGTCTCTTGATACCTATTTCTCTTAGGCAC         |
| 70[104] | AACGCGCCTTACCGGATACCT                              |
| 70[125] | TAGGTTTTTCTCCCTTCGGGAAGCGTGGAACACATACGTGG          |
| 70[146] | TTGAAG                                             |
| 70[160] | AATTATATCGCACG                                     |
| 70[168] | GTGCGAGG                                           |
| 70[62]  | AATGTTTCTGGAAGCTCCCT                               |
| 70[86]  | GGTATCAATTTCTCCTGTTCCG                             |
| 71[140] | CACAGACAATATTTTTGAATGGCTTTTTGTCTTTAATGCGCGAACTG    |
| 71[39]  | TTTACATTGGTGTAAGGTTACACAACCTTTTACCGGTCAAGAC        |
| 71[98]  | AGAGATAAATATCAAACCCTCAATCAATATCTGGTCAGTTGG         |
| 72[125] | TTGACGGGGAAAGCCGGCGAAAGTGCCTATCCG                  |
| 72[162] | TAAATCGGAACCCTAATTTACAGCGCG                        |
| 72[76]  | AAAGGAGCGGGCGCTTAGGCCACATCGTAATGCATAAGGCCA         |
| 73[105] | TCCGCCCCCTGACGAG                                   |
| 73[122] | egtcctccgaccCATCACAAAATCGACGCAATGTGTGAGAGCTCACAGTC |
| 73[154] | GCGAAACGCAACCCAGTACTCGAACATG                       |
| 73[161] | CCGACAGGACTTTAAAGATACCAGGC                         |
| 73[28]  | CTTGCTAAGG                                         |
| 73[38]  | TGAGCAAAAGGCCAGCAA                                 |
| 73[63]  | GGAACCGTAAAAAGGCC                                  |
| 73[80]  | GCGTTGCTGGCGTTTTTCATTTCTGGTTGATT                   |
| 74[106] | CCTCAGTAACATAGGC                                   |
| 74[118] | GTTTCGAGCTCACCTATCCTGCCGAGGGGATGCGA                |
| 74[148] | AGACAGTGTTCAAGTCAGAGGTG                            |
| 74[34]  | CGGAGACAAGGTTTTTTTTCCTAAATGGGAG                    |
| 74[43]  | TAAAGACGG                                          |
| 74[55]  | AGGGCTACTGAA                                       |

|         |                                                   |
|---------|---------------------------------------------------|
| 74[83]  | GCGGGGAAGCGCCTGCACACGGGTGAGGAAAGCG                |
| 75[140] | CCATCCAAGGGAGCCCCGATTTAGAGC                       |
| 75[98]  | ACGTGCCCGTGGCGAGAAAGGAAGGGAATCCGTTGCGCCCAC        |
| 76[101] | TAGATTAAGACCCTAACAAAAAGATACTGCAGAGCGATAGCT        |
| 76[59]  | ATCATAGGTCTCATCTGGGAGTTTCTCACGGAATTTATCAAA        |
| 76[80]  | GTCAATAGTGAAGGTACCCCTAGGCCGTTCCAGCTGAGAAGA        |
| 77[122] | GACTTAAATGCCTTGAAAACAT                            |
| 78[115] | CCACACCCGCCGCGGGCTTAAGTACTGAGCACAGTCGCGTAACCA     |
| 78[136] | CGGTCACGCTGAATAAAAATCTTAAAGGACTGAAATAACTGCAACTT   |
| 78[153] | GGCGCTGGTCAAAACAAGTGG                             |
| 79[126] | CGAGCGGATGCACACGGGAGACCACGCCTCCACGAGCAAGTGTAG     |
| 79[140] | TTGAGGTATCCTA                                     |
| 79[153] | ACTCTGGATAACTG                                    |
| 79[167] | GCCTCTGG                                          |
| 79[56]  | GCTCCAGATTTAT                                     |
| 79[69]  | CAGCAATAAACCAGCCAGCCGG                            |
| 79[91]  | AAGGGCCCTCCATCAGAGCTAAATTCATGCGCTTAATGAACCATACTAA |
| 8[104]  | TCGATAAGCACCTTTTGCTACTCAAGAATATTACGGAATAAT        |
| 8[62]   | TCTGCTGTTCCCGATGAAGCGTATAAAACGGGATTCCGGTTC        |
| 80[104] | TATCCGCGAGCGCAGAAGTGGTCTGTCTTAGAAC                |
| 80[158] | CTAACGTGAGGCTTCTATA                               |
| 80[179] | GGCGTGAAGGCACGGCGCCCC                             |
| 80[74]  | GCCGGGAAGCTAGAGTAAG                               |
| 81[161] | GTTTCATTCATATTTTTTTGCCCCTTCGAGGGCTGTTT            |
| 81[57]  | CAACATAGTAATTTATTTTTTTGTGGCAGCT                   |
| 81[70]  | GCAGTTACCCTTACCTTTGTCTTACAAATGTAAATGTCTAGT        |
| 81[84]  | GGTGATCCAGTCTATTAATTGTT                           |
| 82[115] | AGACCGAGATATAATAGAGAACCATCACCCCTACGTCTATCAGG      |
| 82[136] | TCCCTTATAAAAAGATAATCAGGGTT                        |
| 82[157] | AATAGGCCGAAAGAAGTACAATATTATTGAAGATGTATTTAGA       |
| 82[178] | AAATCAGCTCACAATTCGATACTCATACTCTTAATAGGGGTTTC      |
| 82[195] | CGCGTTAATCCTTTGCCCGAACGTTAAAAGGGAATA              |
| 82[94]  | TTGTTCCAGTTATCTTTATTTTTGGGGTTCGAGCAACGTCAAAG      |
| 83[109] | GCGATGGCCCCATGAGCATTGTCTACTACGT                   |
| 83[126] | GGATACATATTTGACATTTATACATTTGAGGATTTATCGGCAAAA     |
| 83[151] | AAAATAAACACCTTTTTTTAGACTTTACAAATTTTTTAACC         |

|         |                                                   |
|---------|---------------------------------------------------|
| 83[172] | CGCGCACATTATGTTGAACAACCTCGTATTAAAATTTTTGTT        |
| 83[196] | CACCTAAATTGTTGTTAAAATT                            |
| 83[70]  | TGGACTCGTGCCGTAGGTTATCTAAAATTGGAACAAGAGTCC        |
| 83[88]  | GGCGAAAAACATCAAGTGGAGCACTAACAACGGGTTGAGTG         |
| 84[139] | GGAAACGCAGAATCGGCCAACGCGCGGGGAGAGGCCAACCTGAGACGAT |
| 84[153] | CAGAAGGCAAAAGAGCCGGGTTACCTGCGGCGCTTTCGCACT        |
| 84[576] | ATATAACAGTTCATAAATATTCATTGAATCCAGTTTCATTCC        |
| 84[597] | GGTGTCTGGACCCTCAAATGCTTTAAACAGTAACTAAAGTAC        |
| 84[69]  | CAGATATCACATTAGGTGCTGCGGCCAGATGCCAACGGCAGC        |
| 84[97]  | GTATTACCGCGCCCACTGCCCTGCGCGCCTGTGCGTGGTGC         |
| 85[129] | GGGTCATTGCAAGCCAGCGGTGCCGGTGCCCCAGCATCAGCG        |
| 85[154] | CAATCCGATCAGATACTGGCATGATTAA                      |
| 85[45]  | CAACCGCAAGAAATGCGGCGGGCCGTTTTCACTGGTCAGCAG        |
| 85[70]  | ACCGTCGACTCTGTATTGCGTTGCGCTCAATAGCAAGCAAAT        |
| 85[84]  | CATCCCACGCAACCAGTGTCAGCTTTCAGTCGGGGGTTTGC         |
| 86[104] | CCAGCGCAGCTTACGGCTGGAGGTGTCCCTGCATCTCGTGCC        |
| 86[34]  | GGTCATAACGGTTTTTTTTTCTGCCAGCAC                    |
| 87[119] | AGCTGCATTAATATAATAACGGAATACCAAACCGA               |
| 88[101] | TAATGCCCCCTATAAAGGTGGCAACATATAAATATAAACAGT        |
| 88[59]  | GAAAGTATTAATCCTTATTACGCAGTATGTTATCTGAAACAT        |
| 88[80]  | GAACCTATTATGCAAACGTAGAAAATACATACGCCTATTTTCG       |
| 89[122] | AGAAACGCAAAAACAGTGCCCCG                           |
| 9[119]  | AGTTCTGGCCGCTCTGGCATATCACGAGTTGGCGCACTGAG         |
| 9[147]  | CATCCGGCACGATAATTTTTTAGCAGCAAGGTGAAGACCT          |
| 9[39]   | CAGATCTACGGGAGTGTTCTGGACTTTTCACACAGCCTACAATTAT    |
| 9[77]   | GTCAATCCTCCCTCAGACTCTACGAGGGATTTCAGATAGAG         |
| 90[132] | TTCTAAGACAACATTTGAGggggetctg                      |
| 90[90]  | GGAGGTTTTGAAGCCTTAAATCAAGATTACAATCAGACAAAA        |
| 91[122] | AGAGCACATCCTCATAACGGAatggacca                     |
| 91[143] | ACGTGCCGGACTTGTAGATTCTTCGgcactagt                 |
| 91[49]  | AGTTAAAATTCAACAAGTTTATTTTGTGAGTTGCTATTTTGCACCCA   |
| 91[80]  | ttggetcACGCGGTCCGTTTTTTTCG                        |
| 92[104] | TTCGTAATCTCGTCGCTGGCAGCCTCCGGCCaaggttc            |
| 92[127] | GATCCCCGGGTACCGAGCTCACaagtagac                    |
| 92[153] | CGTCCGTGAGCCTCCTCACAGACGAGCCGGAAGCAAGGCTTATCCGGTA |
| 92[169] | cgtgcgacGCGTGCCTG                                 |

|         |                                                 |
|---------|-------------------------------------------------|
| 92[62]  | GGGCGACCGATGCTGATTGCCGTTCCGGCAAAtcgaactc        |
| 92[85]  | aacgctacGTTTACCAGCGCCAAAATAGAAA                 |
| 92[97]  | TCATGGTCATAGggttgctg                            |
| 93[119] | ATTCCACAACGCGAGGCGTTTTAGCGAAGTTATCCGCTCGAA      |
| 93[147] | TAAAGTGTAAGCCTGTTTTTTCCTAATGAGTGAGCTAACT        |
| 93[39]  | ACCACGGAATCGATTGAGGGAGGGAATTTAAATATTGACGGAAGGCG |
| 93[77]  | ATTCATATGCTGTTTTCCTGTGTGAAATTCCTCCCGACTTGCG     |
| 94[139] | TAATCTTGACAAGAGATTGGCGTCACCGACTTGAGTGTGTAC      |
| 94[162] | GGCTGGCTGACCTTCAACAAATACATTAAAGGTGAATATCCCGT    |
| 94[90]  | CTGCTCAGAGCCGCACCAGTAGCACCATAAACTTAAATTTCT      |
| 95[126] | ATCGACATAAAAAATATCACCTTGATATTCACAATCAAGAG       |
| 95[147] | AAAAAAGCCGCACAATTATTAATCCTCATTAAAG              |
| 95[166] | GCCTTTTGTGATGAAGGGTAA                           |
| 95[45]  | TCACGGAAAAACGTCACCAATGAAACCATCGAGGGATAGCTC      |
| 95[91]  | GCTCATTCAAAATCCGCCAGCATTGACATCAACGTAACAAAG      |
| 96[104] | GAGCCAGTGCCGCCAGCAGTTGGGCGGTCCATTTGGAGGCAG      |
| 96[34]  | TAGCAGCACCGTTTTTTTTTCAGTAGCGAC                  |
| 96[62]  | CCGGAAAGAGACGCAGAAACAGCGGATCTACCATTCAGAACC      |
| 97[119] | GTCAGACACCGGATATTCATTACCCAAAGGAGGTTGGAATTA      |
| 97[77]  | ACCACCATTGAGTGAATAAGGCTTGCCCCCGCCACAGCAAGG      |
| 98[59]  | AGTTTTAACGGGAATGGAAAGCGCAGTCTCTGACTGGTAATA      |
| 98[79]  | ACAGGAGTGTAATTTACCGT                            |
| 98[87]  | TTGATGATTCCAGTAAGCGTCATAGCAAGCCC                |
| 99[104] | AATAGGAACTCATTTCAGGGATACATGGCTT                 |
| 99[122] | CCCATGTACCGGAGCCACCACC                          |



**Table S2.** Sequences of replacement strands for sliding. The names are indicated in the order of route, position, and sequence number. Q represents complementary sequences

| Name     | Sequence                                        |
|----------|-------------------------------------------------|
| R1Q.0.1  | GTCCAATAGCATAAGGTG                              |
| R1Q.0.2  | TAGTCTATATGAGAATATTGAATACTTCT                   |
| R1Q.0.3  | TTAATCTAGAACATCCGCCAGACCTTTGCACTTATATGAT        |
| R1Q.0.4  | GCTCCACGTCCACACTAATTTGGTC                       |
| R1Q.0.5  | GATTCATCTCTAACATCGAGACTGC                       |
| R1Q.0.6  | GTTGTTTACCCGTAAGTGGCTTTCGACGTAACGGTGCTGTCGCAGGA |
| R1Q.0.7  | CATCACTTCAGAAAAAACGCCATCCCAGCGCCG               |
| R1Q.0.8  | CCCTGGTGGTCGTAAGCGTGTGTGCCTCCCTA                |
| R1Q.0.9  | TAAGGTGTCCTTAGCAAG                              |
| R1Q.0.10 | TTGCTGGCCTTTTGCTCATCATCCTG                      |
| R1Q.0.11 | TTTGACGCGGCCTTTTTACGGTTC                        |
| R1Q.0.12 | AATCAACCAGAAATGAAAAACGCCAGCAACGCGCAGTTTT        |
| R1Q.0.13 | ACCCATACCTCGTCAGGGGGGCGGA                       |
| R1Q.0.14 | ACACATTGCGTCGATTTTTGTGATGGTTAACCG               |
| R1Q.0.15 | CCGTCTTTATGCTGATG                               |
| R1Q.0.16 | ATGGCCATTTAGTAGCCCT                             |
| R1Q.0.17 | TATGTTGTCGGATAGGCACTTTCGCCG                     |
| R1Q.0.18 | GCCTATGTTACTGAGGAGATCTGA                        |
| R1Q.0.19 | GAGAGGCTCGCGCTGTGAAATTAGGGTCCGATTTA             |
| R1Q.0.20 | CACCTCTGACTTGAACACTGTCTGGTGTGTC                 |
| R2Q.0.1  | AAGCTATCCGAGGATCTGTAG                           |
| R2Q.0.2  | TAGGGCCGAGAGACCAATGTCATCAACTGA                  |
| R2Q.0.3  | ACTGACTTAGTAGATGACGAC                           |
| R2Q.0.4  | GTCATTCTAAGCCTTAACACCCGTCGATGA                  |
| R2Q.0.5  | GGTACCAAGGCAGATCAGGTC                           |

|          |                                          |
|----------|------------------------------------------|
| R2Q.0.6  | ATCCTTGATTTGATCG                         |
| R2Q.0.7  | TGGCTACCCCGAGCTGCGTCCCACAGGC             |
| R2Q.0.8  | GATCCGAGAAGCGGGT                         |
| R2Q.0.9  | CCCTCTGATCTGTAGTACTGAGAGTTGC             |
| R2Q.0.10 | TGTATTGCACTGGATC                         |
| R2Q.0.11 | GCTTTGGCATTTCGTCA                        |
| R2Q.0.12 | TCGTACCCTTCGGTAAGGCCT                    |
| R2Q.0.13 | GCTATGGAATAAATCTGGAGC                    |
| R2Q.0.14 | CCGGCTGGCTGGTTTATTGCTGTTAATCGT           |
| R2Q.0.15 | GCGGATAAAGTTGCAGTTATTGGACAGACAATGCGGC    |
| R2Q.0.16 | ATAACGAACACTTCTGCGCTC                    |
| R2Q.0.17 | CAGCAATTCAGTTATCCAGAGT                   |
| R2Q.0.18 | CCAGAGGCACCGTCCG                         |
| R2Q.0.19 | CAGCCTGGAACAATTAATAGACTGGATCACCTTAGTAT   |
| R2Q.0.20 | CTTACTCTAGCTTCCCGGCGCCTCCTA              |
| R2Q.0.21 | GGGGCGCCGTGCCTTCACGCCCGATCATC            |
| R2Q.0.22 | ACAAGTAACTCCCATTTAGGAAAAAAAAACCTTGTCTCCG |
| R3Q.0.1  | ACGACCTCAGCCGGCAGGGTTCGGCGAT             |
| R3Q.0.2  | GAACAACACGGAACAGGAGAAATTGATACC           |
| R3Q.0.3  | ATTGTACTATGAGAAAGCGC                     |
| R3Q.0.4  | GCGTGAGCTCATAGAAC                        |
| R3Q.0.5  | TCAGGTTTTTAGCAGGTCGTGTTGATTTG            |
| R3Q.0.6  | AGGGAGCTTCCAGGAAACATTATAGCTAT            |
| R3Q.0.7  | ACACACCAGGGAGACAGGGTTCTGAGGTT            |
| R3Q.0.8  | AGGTATCCGGTAAGGCGCGTTGTGAGACC            |
| R3Q.0.9  | CTTCAAAAAGTCCCA                          |
| R3Q.0.10 | GGATTTATCGTGCGATATAATT                   |

|          |                                                     |
|----------|-----------------------------------------------------|
| R3Q.0.11 | GCTTGCAACTAGCCGCCTAGCTAAAAAAAAAAGTGTTATATCGACCTA    |
| R3Q.0.12 | CCTCGCACACTTTCAT                                    |
| R3Q.0.13 | CGAAAAAACGGACCGCGTGAGCGCAA                          |
| R3Q.0.14 | GAGTTCGATTGCCGGAACGGCAATCAGCATCGGTGCGCC             |
| R3Q.0.15 | TGGTCCATTCCGTTATGAGGATGTGCTCT                       |
| R3Q.0.16 | ACTAGTGCCGAAGAATCTACAAGTCCGGCACGT                   |
| R3Q.0.17 | GAAACCTTGGCCGGAGGCTGCCAGCGACGAGATTACGAA             |
| R3Q.0.18 | TTTCTATTTTGGCGCTGGTAAACGTAGCGTT                     |
| R3Q.0.19 | CAGCCAACCTATGACCATGA                                |
| R3Q.0.20 | CAGAGCCCCTCAAATGTTGTCTTAGAA                         |
| R3Q.0.21 | GTCTACTTTGTGAGCTCGGTACCCGGGGATC                     |
| R3Q.0.22 | TGGCTGACGTGCTGGCAGAAAAAAAAAACCGGTATGACC             |
| R3Q.0.23 | CAGGCACGCGTCGCACG                                   |
| R1.1.1   | CACCTTATGCcctccatagacaaactcgg                       |
| R1.1.2   | gcctaccgagccgccgatcgTCAATATTCTCATATAGACTA           |
| R1.1.4   | agggtcgtaagtAGTGCAAAGGTCTGGCGGATGTTCTAGATTAA        |
| R1.1.5   | GACCAAATTAGTGTGGAcatcccatagcc                       |
| R1.1.6   | GCAGTCTCGATGTTAGAAgctcgtcaaa                        |
| R1.1.7   | aggctggcttatCAGCACCGTTACGTCGAAAGCCACTTACGGGTAAACAAC |
| R1.1.8   | cgatcatcaacgaggggaaGGATGGCGTTTTTTTCTGAAGTGATG       |
| R1.1.9   | TAGGGAGGCACACACGCTTACGACTccactctttcaggaaatc         |
| R1.1.10  | CTTGCTAAGGgtctatgagggaaagcaca                       |
| R1.1.11  | tcatgcctcgatcgccggctTGAGCAAAAGGCCAGCAA              |
| R1.1.12  | GGAACCGTAAAAAGGCCcccgtcgattgc                       |
| R1.1.13  | cgtctccgaccGCGTTGCTGGCGTTTTTCATTTCTGGTTGATT         |
| R1.1.14  | TCCGCCCCCTGACGAGcccgtcgattgc                        |
| R1.1.15  | cgtctccgaccCATCACAAAAATCGACGCAATGTGT                |

|         |                                               |
|---------|-----------------------------------------------|
| R1.1.16 | ggttgaagtccccctcgtTAAAGACGG                   |
| R1.1.17 | AGGGCTACTGAAgaaagaagtggaaagaaact              |
| R1.1.18 | CGGCGAAAGTGCCTATCCGctccttogaatg               |
| R1.1.19 | ctaaaaagtcttCCTCAGTAACATAGGC                  |
| R1.1.20 | TAAATCGGAACCCTAATTTACAGCGCGcgtcaagcctag       |
| R1.1.21 | ataggcaacgctAGACAGTGTTCAGTCAGAGGTG            |
| R1Q.1.1 | cggagttgtctatggagggGCATAAGGTG                 |
| R1Q.1.2 | TAGTCTATATGAGAATATTGAcgatcggcggctcggtaggc     |
| R1Q.1.3 | ttaaaccgTTGGACATCGCTACGCTTAACCGGGAACACTATG    |
| R1Q.1.4 | CATCACTTCAGAAAAAACGCCATCCtccccctcgttgatgatcg  |
| R1Q.1.5 | gattcctgaagaagtggaGTCGTAAGCGTGTGTGCCTCCCTA    |
| R1Q.1.6 | tgtgctttccctcatagacCCTTAGCAAG                 |
| R1Q.1.7 | TTGCTGGCCTTTTGCTCAagccgccgatcgagcatga         |
| R1Q.1.8 | CCGTCTTTAaacgagggggaactcaacc                  |
| R1Q.1.9 | agtttcttccactcttctTCAGTAGCCCT                 |
| R1.2.1  | CACCTTATGC                                    |
| R1.2.2  | TCAATATTCTCATATAGACTAgcaatcgacggg             |
| R1.2.3  | ggtcggaggacgCATAGTTCCCGGTTAAGCGTAGCGATGTCCAA  |
| R1.2.4  | ggcaaggcaagacttttagGGATGGCGTTTTTTTCTGAAGTGATG |
| R1.2.5  | TAGGGAGGCACACACGCTTACGACcattcgaaggagaggacggc  |
| R1.2.6  | CTTGCTAAGGggctatgggatgtaaccaga                |
| R1.2.7  | gaacagacacttacgaccctTGAGCAAAGGCCAGCAA         |
| R1.2.8  | TAAAGACGG                                     |
| R1.2.9  | AGGGCTACTGAA                                  |
| R1Q.2.1 | CATCACTTCAGAAAAAACGCCATCCctaaaaagtcttgcttgcc  |
| R1Q.2.2 | gccgtcctctccttogaatGTCGTAAGCGTGTGTGCCTCCCTA   |
| R1Q.2.3 | tctggttacatccatagccCCTTAGCAAG                 |

|         |                                                      |
|---------|------------------------------------------------------|
| R1Q.2.4 | TTGCTGGCCTTTTGCTCAagggtcgtaatgtctgttc                |
| R1Q.2.5 | gactgcacgcaatcgacgggGGCCTTTTACGGTTCC                 |
| R1Q.2.6 | AATCAACCAGAAATGAAAAACGCCAGCAACGCggtcggaggacggtgtacta |
| R1Q.2.7 | cgtgctaccattcgaaggagCGGATAGGCACCTTCGCCG              |
| R1Q.2.8 | GCCTATGTTACTGAGGaagacttttaggatagtc                   |
| R1.3.1  | agcgttgccatGGATGGCGTTTTTTTCTGAAGTGATG                |
| R1.3.2  | TAGGGAGGCACACACGCTTACGACctaggcttgacg                 |
| R1.3.3  | CTTGCTAAGGtttgaacgagct                               |
| R1.3.4  | ataagccagcctTGAGCAAAAGGCCAGCAA                       |
| R1.3.5  | GGAACCGTAAAAAGGCCggtatgggatg                         |
| R1.3.6  | acttacgacctGCGTTGCTGGCGTTTTTCATTTCTGGTTGATT          |
| R1.3.7  | CGGCGAAAGTGCCTATCCG                                  |
| R1.3.8  | CCTCAGTAACATAGGC                                     |
| R2.1.1  | CTACAGATCCTCGcgtcggtcgata                            |
| R2.1.2  | ttgttcgtaagaTGACATTGGTCTCTCGGCCCTA                   |
| R2.1.3  | GTCGTCATCTACTaggggaatcggc                            |
| R2.1.4  | actaccttgagGGGTGTTAAGGCTTAGAATGAC                    |
| R2.1.5  | GACCTGATCTGCCggcagactgttttcgagca                     |
| R2.1.6  | ataacgcactatatttgatTCAAGGAT                          |
| R2.1.7  | GCCTGTGGGACGCAGCTCGGgtcacaccgggc                     |
| R2.1.8  | gagtccgcctgCTCGGATC                                  |
| R2.1.9  | GCAACTCTCAGTACTACAGAtcctcgacgggg                     |
| R2.1.10 | gggagcactgcgGCAATACA                                 |
| R2.1.11 | accaacatcagcctcaagctGCCAAAGC                         |
| R2.1.12 | AGGCCTTACCGAAgttgaatttaccataatca                     |
| R2.1.13 | GCTCCAGATTTATgctccccgtgg                             |
| R2.1.14 | attctctatgtcCAGCAATAAACCAGCCAGCCGG                   |

|         |                                             |
|---------|---------------------------------------------|
| R2.1.15 | ccaccttaaatgGTCTGTCCAATAACTGCAACTTTATCCGC   |
| R2.1.16 | GAGCGCAGAAGTGcaccaattttcg                   |
| R2.1.17 | TTGAGGTATCCTAaaacgttt                       |
| R2.1.18 | ACTCTGGATAACTGaaacagtctgccccgattgcg         |
| R2.1.19 | acggtgcatcaaaatataGCCTCTGG                  |
| R2.1.20 | ATACTAAGGTGATCCAGTCTATTAATTGTTatacagggtaa   |
| R2.1.21 | tattgccagcGCCGGGAAGCTAGAGTAAG               |
| R2.1.22 | CTAACGTGAGGCTTCTATAgttggtat                 |
| R2.1.23 | cccgcgtagcttgaggctgGGCGTGAAGGCACGGCGCCCC    |
| R2.1.24 | CGGAGACAAGGTTTTTTTTTCTAAATGGGAGggtaaattcaac |
| R2Q.1.1 | tgctgcgaaaacagtctgccGGCAGATCAGGTC           |
| R2Q.1.2 | ATCCTTGaatcaaaatatagtgcgttat                |
| R2Q.1.3 | GCTTTGGCagcttgaggctgatgttggt                |
| R2Q.1.4 | tgattatgggtaaattcaacTTCGGTAAGGCCT           |
| R2Q.1.5 | aaacgttTAGGATACCTCAA                        |
| R2Q.1.6 | cgcaatcgggcagactgtttCAGTTATCCAGAGT          |
| R2Q.1.7 | CCAGAGGCctatattttgategcaccgt                |
| R2Q.1.8 | ataccaacTATAGAAGCCTCACGTTAG                 |
| R2Q.1.9 | GGGGCGCCGTGCCTTACGCCcagcctcaagctagcgggg     |
| R2.2.1  | GACCTGATCTGCCcgaaaattggtggcggtca            |
| R2.2.2  | ccgtaagcatttaaggtggTCAAGGAT                 |
| R2.2.3  | GCCAAAGCagcatag                             |
| R2.2.4  | AGGCCTTACCGAAActtaattt                      |
| R2.2.5  | TTGAGGTATCCTAgccgattccccttagccgca           |
| R2.2.6  | ctttggccctcaagtagtACTCTGGATAACTG            |
| R2.2.7  | GCCTCTGG                                    |
| R2.2.8  | atattaatcgcagtgtcccCTAACGTGAGGCTTCTATA      |

|          |                                                      |
|----------|------------------------------------------------------|
| R2.2.9   | GGCGTGAAGGCACGGCGCCCCccccgtcgaggaaaaacgac            |
| R2Q.2.1  | tgaacgccaccaattttcgGGCAGATCAGGTC                     |
| R2Q.2.2  | ATCCTTGAccaccttaaatgcttaccgg                         |
| R2Q.2.3  | ctatgctgGCTTTGGC                                     |
| R2Q.2.4  | aaattaagTTCGGTAAGGCCT                                |
| R2Q.2.5  | GCGGATAAAGTTGCAGTTATTGGACAGACcatttaaggtggaggttccc    |
| R2Q.2.6  | aatcgccacgaaaattggtgCACTTCTGCGCTC                    |
| R2Q.2.7  | tggcgtaaggggaatcggcTAGGATACCTCAA                     |
| R2Q.2.8  | CAGTTATCCAGAGTactacctggaggggccaaag                   |
| R2Q.2.9  | TATAGAAGCCTCACGTTAGgggagcactgcgattaatat              |
| R2Q.2.10 | gtcgttttctcgcacggggGGGGCGCCGTGCCTTCACGCC             |
| R2.3.1   | GACCTGATCTGCCccacggggacgc                            |
| R2.3.2   | gacatagagaatTCAAGGAT                                 |
| R2.3.3   | gcctggcgaataGCCAAAGC                                 |
| R2.3.4   | AGGCCTTACCGAAttaccctgtat                             |
| R2.3.5   | GTCTGTCCAATAACTGCAACTTTATCCGC                        |
| R2.3.6   | GAGCGCAGAAGTG                                        |
| R2.3.7   | TTGAGGTATCCTAtatcgaccgacg                            |
| R2.3.8   | tcttacgaacaaACTCTGGATAACTG                           |
| R2.3.9   | cagggcgactcCTAACGTGAGGCTTCTATA                       |
| R2.3.10  | GGCGTGAAGGCACGGCGCCCCgcccgtgtgac                     |
| R3.1.1   | TAGGTTCGATATAAACTTTTTTTTTTAGCTAGGCGGCTAGcgtgtgcttgat |
| R3.1.2   | aatgtgaatctgGTGCGAGG                                 |
| R3.1.3   | GGTCATACCGGTTTTTTTTTCTGCCAGCACatcaagcacacgtgagagcc   |
| R3.1.4   | gcagcgcacagattcacattGCGTGCCTG                        |
| R3Q.1.1  | ATCAAGCACACGCTAGCCGCCTAGCTAAAAAAAAAAGTGTTATATCGACCTA |
| R3Q.1.2  | CCTCGCACCAAGATTACATT                                 |

|          |                                                     |
|----------|-----------------------------------------------------|
| R3Q.1.3  | GGCTCTCACGTGTGCTTGATGTGCTGGCAGAAAAAAAAAACCGGTATGACC |
| R3Q.1.4  | CAGGCACGCAATGTGAATCTGTGCGCTGC                       |
| R3.2.1   | GCGCTTTCTCATtcaatcggaagtatgtagac                    |
| R3.2.2   | aatagcagatacaccccttgaAGCTCACGC                      |
| R3.2.3   | AACCTCAGAACCCTGTCTCCCcggttagtgtaagetgctg            |
| R3.2.4   | ccactgtgtgactaagggAACGCGCCTTACCGGATACCT             |
| R3.2.5   | ccgaagtggcgactgtaacTTTGAAG                          |
| R3.2.6   | AATTATATCGCACGcatctgacgaattgacacca                  |
| R3.2.7   | cagcaggctcaagggtgatAGAGCACATCCTCATAACGGA            |
| R3.2.8   | TTCGTAATCTCGTCGCTGGCAGCCTCCGGCCacttccgattga         |
| R3.2.9   | TTCTAAGACAACATTTGAGattcgtcagatggtggcgat             |
| R3.2.10  | tatccgccgttacagtcgccGATCCCCGGGTACCGAGCTCACA         |
| R3.2.11  | GGTCATACCGGTTTTTTTTTCTGCCAGCACtaactaaccgcatatcat    |
| R3.2.12  | attaactccccttagtcacaGCGTGCCTG                       |
| R3Q.2.1  | GTCTACATACTTCCGATTGAATGAGAAAGCGC                    |
| R3Q.2.2  | GCGTGAGCTTCAAGGGTGTATCTGCTATT                       |
| R3Q.2.3  | CAGCAGCTTAACACTAACCGGGGAGACAGGGTTCTGAGGTT           |
| R3Q.2.4  | AGGTATCCGGTAAGGCGCGTTCCTTAGTCACACACAGTGG            |
| R3Q.2.5  | CTTCAAAGTTACAGTCGCCAACTTCGG                         |
| R3Q.2.6  | TGGTGTCAATTCGTCAGATGCGTGCGATATAATT                  |
| R3Q.2.7  | TCCGTTATGAGGATGTGCTCTATACACCCTTGAGCCTGCTG           |
| R3Q.2.8  | TCAATCGGAAGTGGCCGGAGGCTGCCAGCGACGAGATTACGAA         |
| R3Q.2.9  | ATCGCCACCATCTGACGAATCTCAAATGTTGTCTTAGAA             |
| R3Q.2.10 | TGTGAGCTCGGTACCCGGGGATCGGCGACTGTAACGGCGGATA         |
| R3Q.2.11 | ATGATATGCGGTTAGTGTTAGTGCTGGCAGAAAAAAAAAACCGGTATGACC |
| R3Q.2.12 | CAGGCACGCTGTGACTAAGGGGAGTTAAT                       |
| R3.3.1   | tactaaactgcACCCTGCCGGCTGAGGTCGT                     |



|         |                                            |
|---------|--------------------------------------------|
| R3.3.2  | GGTATCAATTTCTCCTGTTCCGatctcgatcaga         |
| R3.3.3  | GCGCTTTTCATggttcacaacta                    |
| R3.3.4  | ctatttgtaaaAGCTCACGC                       |
| R3.3.5  | CAAATCAACACGACCTGCTAAcggacaacctgt          |
| R3.3.6  | ccctaagcatccAATGTTTCCTGGAAGCTCCCT          |
| R3.3.7  | AACCTCAGAACCCTGTCTCCCcggttagtgta           |
| R3.3.8  | tgtgactaaggAACGCGCCTTACCGGATACCT           |
| R3.3.9  | ctgttgatcgtTTTGAAG                         |
| R3.3.10 | AATTATATCGCACGgcaacctcgtg                  |
| R3.3.11 | ttaacaaatagACGCGGTCCGTTTTTTCG              |
| R3.3.12 | GGGCGACCGATGCTGATTGCCGTTCCGGCAAtagttggaacc |
| R3.3.13 | AGAGCACATCCTCATAACGGAtctgatcgagat          |
| R3.3.14 | gcacgttagtaACGTGCCGGACTTGTAGATTCTTCG       |
| R3.3.15 | acgatcaacaagGTTTACCAGCGCCAAAATAGAAA        |
| R3.3.16 | TCATGGTCATAGcacgaaggtgc                    |
| R3.3.17 | TTCTAAGACAACATTTGAGtaacactaacgg            |
| R3.3.18 | cccttagtcacaGATCCCCGGGTACCGAGCTCACA        |
| R3.3.19 | GGTCATACCGTTTTTTTTTTCTGCCAGCACacaggtgtccg  |
| R3.3.20 | ggatgcttaaggGCGTGCCTG                      |
